# Supplementary material for: Evaluation of the Potential Protective Effect of Ellagic Acid against Heavy Metal (Cadmium, Mercury, and Lead) Toxicity in SH-SY5Y Neuroblastoma Cells
Source: MDPI journal article supplement (doi:10.3390/foods13030419), 2024-01-28
Supplement: s1 [file s1]

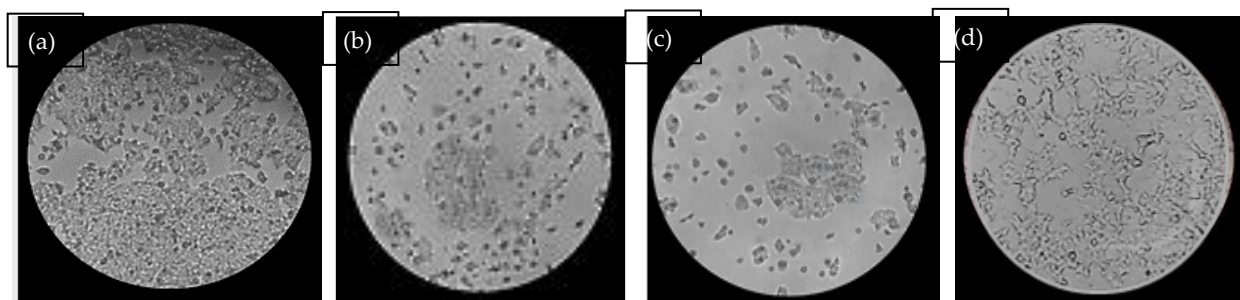

**Figure S1.** Inverted phase-contrast images of SH-SY5Y cells (20 x magnification) treated with only-vehicle, control cells (a), Cd<sup>2+</sup> (b), Hg<sup>2+</sup> (c), and Pb<sup>2+</sup> (d) at a concentration of 25 μM.

The results obtained with the MTT assay were confirmed by the observation of the cells under the inverted phase-contrast microscopy (Figure 1). Indeed, cells in the control group, treated with the vehicle only, showed normal neuronal cells morphology after 24h. On the contrary, cells exposed to Cd<sup>2+</sup> at a concentration of 25 μM exhibited an irregular morphology, decreasing in number (about 50%) with respect to control cells. A similar cellular distribution and morphology was observed for cells treated with Hg<sup>2+</sup> 25 μM. Instead, after 24h of treatment with Pb<sup>2+</sup> cells morphology appeared more similar to that of control cells with a slight decrease in cells number.

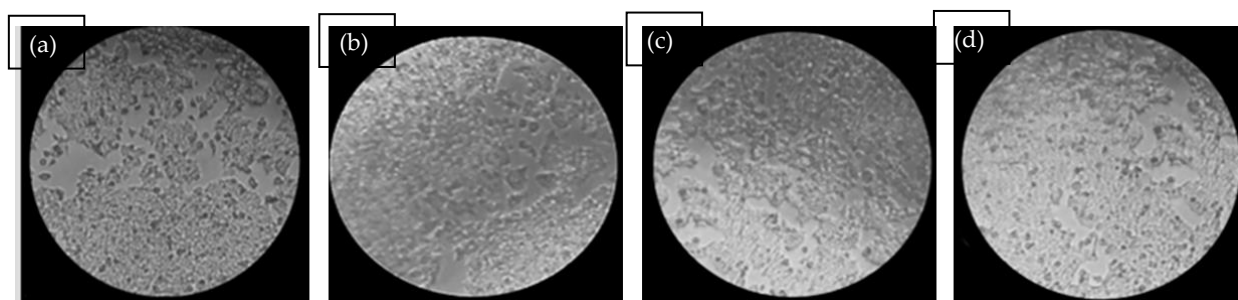

**Figure S2.** Inverted phase-contrast images of SH-SY5Y cells (20 x magnification) treated with only-vehicle, control cells (a), EA 1 μM (b), EA 5 μM (c), and EA 10 μM (d).

Cell morphology results indicated a normal and uniform SH-SY5Y cells distribution along with an intact morphology after 24h. Cells exposed to different concentrations of EA (1–10 μM) showed a similar morphology at all the concentrations compared to control cells (a). However, an increased cells number has been observed thus confirming the results obtained by means of the MTT assay.
